# Supplementary material for: Predicting the denitrification capacity of sandy aquifers from in situ measurements using push–pull 15 N tracer tests
Source: Copernicus journal article supplement (doi:10.5194/bg-12-2327-2015), 2015-04-17
Supplement: Supplementary file 1 [file bg-12-2327-2015-supplement.pdf]

Supplement of Biogeosciences, 12, 2327–2346, 2015  
<http://www.biogeosciences.net/12/2327/2015/>  
doi:10.5194/bg-12-2327-2015-supplement  
© Author(s) 2015. CC Attribution 3.0 License.

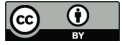

*Supplement of*

## **Predicting the denitrification capacity of sandy aquifers from in situ measurements using push–pull $^{15}\text{N}$ tracer tests**

**W. Eschenbach et al.**

*Correspondence to:* W. Eschenbach (w.eschenbach@gmx.de)

## S1 In situ isotope analysis using MIMS

55 At two multilevel wells in the Fuhrberger Feld aquifer (FFA) (multilevel well B1 and B2) the concentration of  $^{15}\text{N}$  labelled denitrification products in the sampled tracer solution was measured during the conducted push-pull tests directly in the field, using a membrane inlet mass spectrometer (MIMS) as described in Eschenbach and Well (2011). These measurements were done to compare online field MIMS measurements with the offline  
60 laboratory analysis by isotope ratio mass spectrometry (IRMS) as described in section 2.5.1. The instrumental set up was similar to the laboratory setup described in Eschenbach and Well (2011) and installed inside a van. Briefly, it consisted of the quadrupole mass spectrometer a cryotrap, a membrane inlet, a cryostatic water bath, 2 peristaltic pumps, a reduction furnace and a T-connection.

65 After injection of tracer solution into the respective depths of the monitoring wells, samples of the tracer solution were extracted using a peristaltic pump (masterflex COLE-Parmer, Vernon Hills, USA) (see section 2.2). A subsample of the sampled tracer solution was then pumped through a T-connection using a second peristaltic pump (ISMATEC, BVP-Standard, Wertheim-Mondfeld, Germany). The T-connection was directly connected via stainless steel  
70 tubing with the membrane inlet of the mass spectrometer (described in detail in Eschenbach and Well (2011)). The dissolved gasses in the sampled tracer solution diffused in the membrane inlet through the gas permeable membrane into the high vacuum of the mass spectrometer. A copper reduction furnace and a cryotrap were placed in the vacuum line between membrane inlet and the ion source of the mass spectrometer.  $\text{N}_2\text{O}$  was reduced to  $\text{N}_2$   
75 within the reduction furnace. Therefore  $^{15}\text{N}$  labelled denitrification derived  $\text{N}_2$  and  $\text{N}_2\text{O}$  was analyzed as  $(\text{N}_2+\text{N}_2\text{O})$  on the molecular ion masses 28, 29 and 30 as  $^{28}\text{N}_2$ ,  $^{29}\text{N}_2$  and  $^{30}\text{N}_2$ . The cryotrap was filled with liquid  $\text{N}_2$  in order to remove water vapour and  $\text{CO}_2$  (see also Fig. 1 Analyser side, in Eschenbach and Well (2011)). The membrane inlet and a flask containing air-equilibrated standard water were placed within a cryostatic water bath (Thermo Haake,  
80 HAAKE AG, Karlsruhe, Germany) to ensure constant membrane inlet, sample and air-equilibrated standard water temperatures. The air-equilibrated standard water was manufactured as described in Kana et al. (1994) and used to calibrate the MIMS.

5 push-pull tests (at multilevel well B1 and at B2, respectively) with parallel online MIMS measurements were conducted, in the depths of 7, 8 (B1) and 8, 9 and 10 m (B2) below soil  
85 surface (Table 1). Overall, there were 58 pairs of IRMS and MIMS measurements. Both online field MIMS and offline laboratory IRMS measurement were in close agreement

(Fig. S1). The averaged concentrations of the sum of  $^{15}\text{N}$  labelled denitrification derived  $\text{N}_2$  and  $\text{N}_2\text{O}$  ( $(\text{N}_2+\text{N}_2\text{O})_{\text{den}}$ ) measured with both methods ranged from 0.9 to 99 and 0.3 to 16  $\mu\text{g N l}^{-1}$ , in samples from B1 and B2 respectively. Maximal differences between MIMS and IRMS measurements of  $(\text{N}_2+\text{N}_2\text{O})_{\text{den}}$  were 6.6 and 2.5  $\mu\text{g N l}^{-1}$  for samples from B1 and B2 respectively (Fig. S2).

The Bland-Altman-method for method comparison was used to evaluate the agreement of both methods (Bland and Altman, 1986) because correlation and regression analysis can result in the context of method comparison to significant misinterpretations (Altman and Bland, 1983; Bland and Altman, 2003, 1995, 1986). Denoting the results of the IRMS and MIMS measurement of  $(\text{N}_2+\text{N}_2\text{O})_{\text{den}}$ , as  $(\text{N}_2+\text{N}_2\text{O})_{\text{IRMS}}$  and  $(\text{N}_2+\text{N}_2\text{O})_{\text{MIMS}}$ , respectively. The differences between measurements of individual samples with both methods [ $(\text{N}_2+\text{N}_2\text{O})_{\text{IRMS}} - (\text{N}_2+\text{N}_2\text{O})_{\text{MIMS}}$ ] were plotted against the average of both measurements [ $(\text{N}_2+\text{N}_2\text{O})_{\text{IRMS}} + (\text{N}_2+\text{N}_2\text{O})_{\text{MIMS}}/2$ ] (Fig. S2). Furthermore the average of differences ( $\bar{d}$ ), the 95 %-limits of method agreement and 95 %-confidence intervals were calculated as described in Bland and Altman (1986).

The distribution of the magnitude of differences in Figure S2 suggests that there is no substantial increase in variance between both methods with increasing magnitude of measurement, which is a prerequisite for the calculation of method bias and 95 %-limits of method agreement without the need of transforming the data. The average of differences ( $\bar{d}$ ) of all parallel measurements (= estimated method bias) was rather small ( $\bar{d}= 0.6 \mu\text{g N l}^{-1}$ ; Fig. S2). The 95 %-limits of method agreement calculated as described in Bland and Altman (1986) were  $\bar{d}\pm 4 \mu\text{g N l}^{-1}$ . This means that 95 % of observed differences are expected to fall within these limits. The confidence bands for ( $\bar{d}$ ) and the 95 %-limits of method agreement are narrow (Fig. S2) with values of  $\bar{d}\pm 0.46$  and 95 %-limits  $\pm 0.8 \mu\text{g N l}^{-1}$ , respectively, showing that sample size was sufficient for the calculation of relative precise values for the estimated method bias and estimated limits of method agreement.

The comparison of online field measurements using MIMS with laboratory offline measurements (IRMS) thus showed a good agreement between both methods (Figs. S1 and S2) with only minor bias under the experimental conditions such as those encountered during this study, i.e. were  $(\text{N}_2+\text{N}_2\text{O})_{\text{den}}$  was in the range of 0.9 to 99  $\mu\text{g N l}^{-1}$  and  $^{15}\text{N}$  abundances of denitrified  $\text{NO}_3^-$  were between 45 and 60 atom %  $^{15}\text{N}$ . This close agreement is in line with our previous study where offline IRMS and online MIMS measurement were compared under laboratory conditions (Eschenbach and Well, 2011). This shows that in situ application does not alter the precision of the MIMS system.

In summary, the MIMS system was suitable for isotope analysis precise enough for the full range of measured concentrations, showing that this analytical system is suitable for in situ analysis during  $^{15}\text{N}$  push pull tests. But still the correction for dilution of the injected tracer solution with ambient groundwater is necessary (see Sect. 2.6). Possibly this can be achieved with an additional inert gas like helium (He), which might be added to the tracer solution by stripping it with He before injection. Helium can then be measured online with the mass spectrometer. Or dilution correction might be achieved by the use of a tracer solution with a different salinity compared to the ambient groundwater.

The main advantages with respect to the conventional IRMS approach is that results can be obtained in the course of experiments directly in the field. Sampling intervals can thus be adapted to get more precise rates. Moreover, the length of the pull phase can be limited to the duration of clearly increasing  $(\text{N}_2+\text{N}_2\text{O})_{\text{den}}$  concentrations to save working time. Finally, the relatively low cost and simple handling of the MIMS system are favourable to enable extensive application of the  $^{15}\text{N}$  push-pull approach to explore denitrification capacities of aquifers.

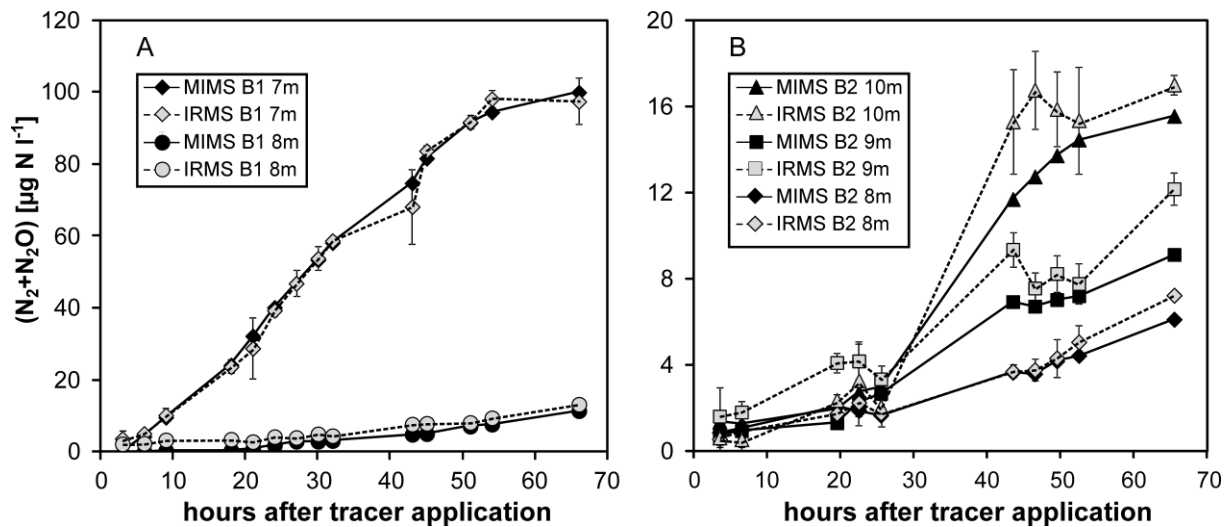

**Fig. S1.** Comparison of online field measurements of  $(\text{N}_2+\text{N}_2\text{O})_{\text{den}}$  from aqueous samples, using a membrane inlet mass spectrometer (MIMS) with standard offline laboratory measurements by means of isotope ratio mass spectrometry (IRMS) at the multilevel wells B1 (A) and B2 (B) for 5  $^{15}\text{N}$  push-pull tracer tests in the Fuhrberger Feld Aquifer.

145

150

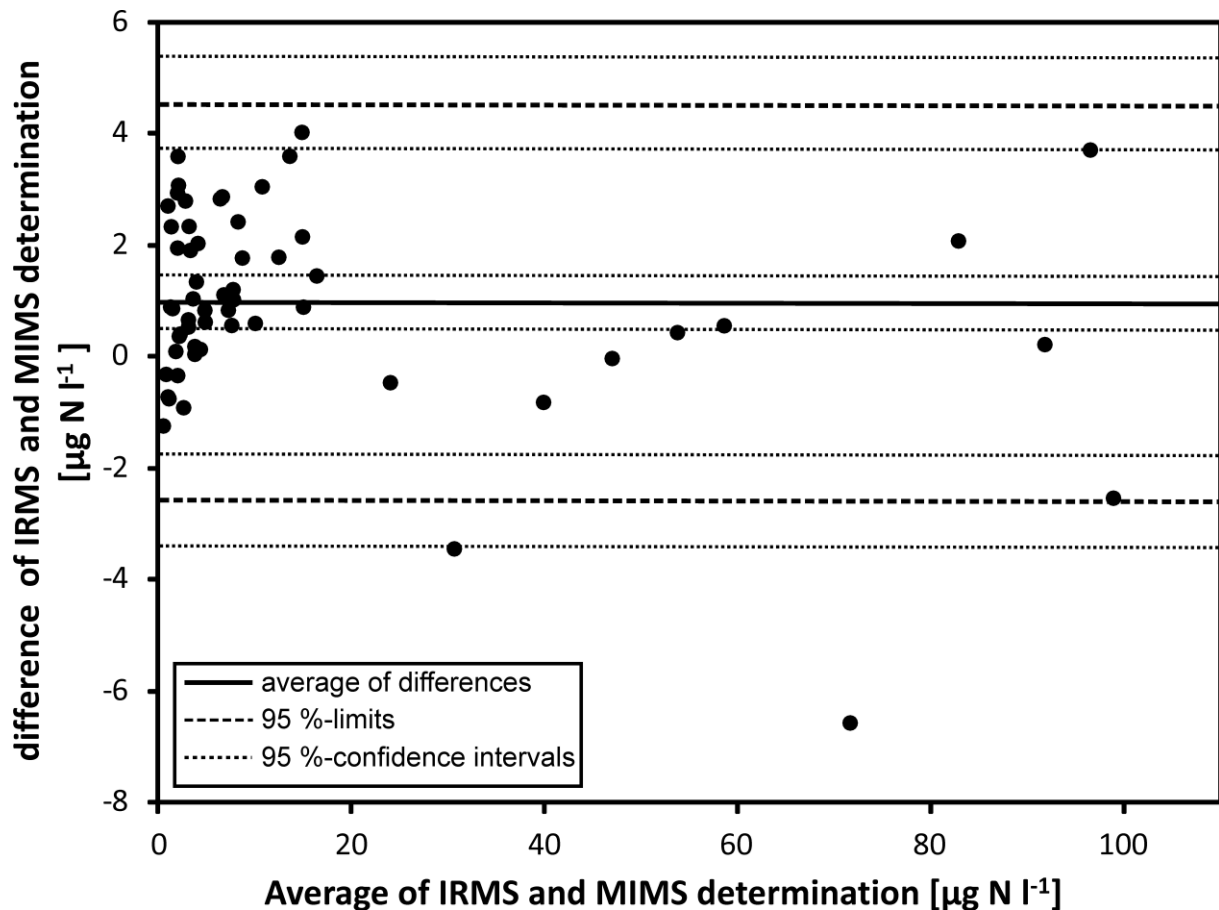

155 **Fig. S2.** Bland-Altman-Plot of the differences between online field MIMS analysis and offline laboratory IRMS measurement plotted against the average of both determinations.

## S2 Possible confounding factors and uncertainties

160 Addy et al. (2002) discussed 3 potential confounding factors for the quantification of  $^{15}\text{N}$  gas formation during push-pull tests: (i) dilution of denitrification derived gases, (ii) degassing of  $^{15}\text{N}$  labelled denitrification derived gasses during the pull-phase of  $^{15}\text{N}$  tracer tests (see therefore also discussion in Eschenbach and Well (2011)) and (iii) a lag phase between  $^{15}\text{N}$  tracer injection and microbial response. In the following it is briefly referred to (iii).

165 Microbial adaptation processes after  $^{15}\text{N}$  tracer injection might require time especially in the  $\text{NO}_3^-$ -free zone of aquifers (see Sect. 4.2), where aquifer material is brought into contact with  $\text{NO}_3^-$  for the first time. After pre-conditioning a clear lag phase was not observed during push-pull tests in the  $\text{NO}_3^-$ -free zone at multilevel well B4 in the FFA, therefore it is believed that this is attributed to the stimulation of denitrifiers due to the repeated injections of  $\text{NO}_3^-$  enriched groundwater at this multilevel well. Therefore, pre-conditioning might be a way to  
 170 shorten or eliminate the observed lag phases between tracer injections and microbial response.

An additional uncertainty during push-pull tests (iv) is the effective porosity of investigated aquifer sediments. The effective porosity determines the volume of aquifer solids in reaction contact with 1 L test solution. Therefore, this value is needed to relate concentration data of evolved  $(\text{N}_2+\text{N}_2\text{O})_{\text{den}}$  from  $(\mu\text{g N L}^{-1})$  to  $(\mu\text{g N kg}^{-1})$ . This conversion strongly increases the coefficient of variation (CV) of concentration measurements of  $(\text{N}_2+\text{N}_2\text{O})_{\text{den}}$  and thus increases the uncertainty of measured  $D_r(\text{in situ})$  because of the uncertainty of the real effective porosity of the tested aquifer material (see Sect. 2.7). The effective porosity at the injection point can be measured with pumping tests prior or after the push-pull  $^{15}\text{N}$  tracer test to reduce this source of uncertainty.

185

190

195

200

205

210

215

220

### S 3. Additional detailed results from laboratory incubations and linear regression models

**Table S1.** Denitrification rates, cumulative denitrification, stock of reduced compounds, sulphate formation capacity and estimated minimal lifetime of denitrification of incubated samples from both aquifers (Eschenbach and Well, 2013) and corresponding in situ denitrification rates.

| Sample location | Depth interval<br>m | Aquifer zone <sup>a</sup> | $D_{cum}(365)^b$<br>mg N kg <sup>-1</sup><br>yr <sup>-1</sup> | SRC <sup>c</sup> |                               |                               | SFC <sup>f</sup><br>mg S<br>kg <sup>-1</sup><br>yr <sup>-1</sup> | $D_r$<br>(in situ)<br>µg N<br>kg <sup>-1</sup> d <sup>-1</sup> |
|-----------------|---------------------|---------------------------|---------------------------------------------------------------|------------------|-------------------------------|-------------------------------|------------------------------------------------------------------|----------------------------------------------------------------|
|                 |                     |                           |                                                               | SRC <sup>c</sup> | SRC <sub>C</sub> <sup>d</sup> | SRC <sub>S</sub> <sup>e</sup> |                                                                  |                                                                |
| FFA B1          | 6.0-7.0             | transition zone           | 17.18                                                         | 659.6            | 599.5                         | 60.1                          | 6.1                                                              | 17.59                                                          |
| FFA B1          | 7.0-8.0             | sulphidic                 | 56.24                                                         | 5974.2           | 5552.7                        | 421.5                         | 39.4                                                             | 1.51                                                           |
| FFA B2          | 2.0-3.0             | non-sulphidic             | 0.19                                                          | 240.8            | 220.7                         | 20.1                          | 0.1                                                              | 0.12                                                           |
| FFA B2          | 3.0-4.0             | non-sulphidic             | 0.37                                                          | 215.4            | 189.2                         | 26.3                          | -0.1                                                             | 0.12                                                           |
| FFA B2          | 4.0-5.0             | non-sulphidic             | 4.34                                                          | 540.2            | 508.0                         | 32.2                          | 1.0                                                              | 0.07                                                           |
| FFA B2          | 8.0-9.0             | transition zone           | 10.53                                                         | 1638.2           | 1515.5                        | 122.7                         | 3.5                                                              | 8.65                                                           |
| FFA B2          | 9.0-10.0            | transition zone           | 12.68                                                         | 610.7            | 502.0                         | 108.7                         | 2.2                                                              | 8.65                                                           |
| FFA B4          | 7.0-8.0             | sulphidic                 | 20.16                                                         | 603.6            | 450.2                         | 153.4                         | 9.6                                                              | 2.76                                                           |
| FFA B4          | 8.0-9.0             | sulphidic                 | 34.09                                                         | 1289.5           | 1038.9                        | 250.7                         | 22.0                                                             | 2.28                                                           |
| FFA B6          | 2.0-3.0             | non-sulphidic             | 2.64                                                          | 687.0            | 648.9                         | 39.1                          | 0.3                                                              | 0.06                                                           |
| FFA B6          | 3.0-4.0             | non-sulphidic             | 1.46                                                          | 1017.4           | 976.5                         | 40.9                          | 0.1                                                              | 0.06                                                           |
| FFA N10         | 4.5-5.0             | transition zone           | 8.69                                                          | 1239.0           | 1204.1                        | 34.8                          | 1.5                                                              | 12.89                                                          |
| FFA N10         | 5.0-5.5             | transition zone           | 8.75                                                          | 721.6            | 687.1                         | 34.5                          | 2.1                                                              | 12.89                                                          |
| FFA N10         | 5.5-6.0             | transition zone           | 7.82                                                          | 674.6            | 640.3                         | 34.3                          | 5.2                                                              | 12.89                                                          |
| FFA N10         | 7.7-8.3             | transition zone           | 15.04                                                         | 329.5            | 290.0                         | 39.5                          | 1.5                                                              | 23.19                                                          |
| FFA N10         | 8.3-8.6             | transition zone           | 15.17                                                         | 331.5            | 298.7                         | 32.9                          | 6.9                                                              | 23.19                                                          |
| FFA N10         | 10.0-10.4           | sulphidic                 | 17.45                                                         | 320.6            | 289.3                         | 31.3                          | 5.4                                                              | -                                                              |
| FFA N10         | 10.4-10.7           | sulphidic                 | 50.07                                                         | 5571.6           | 5247.7                        | 323.9                         | 9.4                                                              | -                                                              |
| FFA N10         | 12.0-13.0           | sulphidic                 | 52.84                                                         | 2771.3           | 2381.7                        | 389.6                         | 37.9                                                             | -                                                              |
| FFA N10         | 13.0-14.0           | sulphidic                 | 38.04                                                         | 2134.1           | 1723.3                        | 410.8                         | 18.2                                                             | -                                                              |
| FFA N10         | 16.0-17.0           | sulphidic                 | 46.65                                                         | 2744.7           | 2431.5                        | 313.2                         | 23.6                                                             | -                                                              |
| FFA N10         | 17.0-18.0           | sulphidic                 | 46.55                                                         | 2642.7           | 2335.0                        | 307.8                         | 36.8                                                             | -                                                              |
| GKA             | 8.0-9.0             | non-sulphidic             | 0.63                                                          | 132.6            | 95.0                          | 37.6                          | 0.9                                                              | 0.00                                                           |
| GKA             | 9.0-10.0            | non-sulphidic             | 0.34                                                          | 97.1             | 70.7                          | 26.4                          | 0.4                                                              | 0.00                                                           |
| GKA             | 22.0-23.0           | non-sulphidic             | 1.57                                                          | 193.3            | 164.2                         | 29.1                          | 0.2                                                              | 0.00                                                           |
| GKA             | 23.0-24.0           | non-sulphidic             | 2.83                                                          | 204.5            | 179.2                         | 25.3                          | -0.0                                                             | 0.00                                                           |
| GKA             | 25.9-27.0           | sulphidic                 | 15.63                                                         | 2857.4           | 2381.0                        | 476.4                         | 1.2                                                              | 1.23                                                           |
| GKA             | 27.0-28.3           | sulphidic                 | 41.82                                                         | 6634.0           | 5943.2                        | 690.8                         | 8.3                                                              | 1.23                                                           |
| GKA             | 28.3-29.3           | sulphidic                 | 37.82                                                         | 4495.6           | 3878.5                        | 617.2                         | 13.8                                                             | 4.43                                                           |
| GKA             | 29.3-30.3           | sulphidic                 | 35.49                                                         | 4766.8           | 4236.0                        | 530.8                         | 8.1                                                              | 4.43                                                           |
| GKA             | 30.3-31.2           | sulphidic                 | 6.54                                                          | 1086.9           | 731.4                         | 355.4                         | 3.8                                                              | 0.50                                                           |
| GKA             | 31.3-32.0           | sulphidic                 | 4.09                                                          | 1122.4           | 777.7                         | 344.7                         | 5.0                                                              | 0.50                                                           |
| GKA             | 32.9-33.7           | sulphidic                 | 7.28                                                          | 1206.0           | 765.6                         | 440.4                         | 10.2                                                             | 0.50                                                           |
| GKA             | 33.7-34.7           | sulphidic                 | 12.25                                                         | 1057.4           | 700.9                         | 356.6                         | 17.7                                                             | 2.00                                                           |
| GKA             | 35.7-36.7           | sulphidic                 | 52.46                                                         | 8861.3           | 8366.7                        | 494.6                         | 30.0                                                             | 6.19                                                           |
| GKA             | 36.7-37.7           | sulphidic                 | 11.07                                                         | 689.6            | 216.7                         | 472.8                         | 9.2                                                              | 6.19                                                           |
| GKA             | 37.7-38.7           | sulphidic                 | 12.06                                                         | 1347.7           | 1083.1                        | 264.7                         | 4.6                                                              | 6.19                                                           |
| GKA             | 65.1-65.4           | sulphidic                 | 13.22                                                         | 1441.2           | 941.3                         | 499.9                         | 1.3                                                              | 2.27                                                           |
| GKA             | 67.1-67.5           | non-sulphidic             | 8.18                                                          | 471.0            | 333.8                         | 137.2                         | 1.3                                                              | 2.27                                                           |
| GKA             | 67.5-68.0           | non-sulphidic             | 8.11                                                          | 487.1            | 351.5                         | 135.6                         | 0.7                                                              | 2.27                                                           |

FFA Fuhrberger Feld aquifer; GKA Großenkneten aquifer; <sup>a</sup> sediment characteristic; <sup>b</sup> cumulative denitrification after one year of incubation; <sup>c</sup> stock of reactive compounds (SRC); <sup>d</sup> fraction of organic carbon in the SRC; <sup>e</sup> fraction of total-S in the SRC; <sup>f</sup> sulphate formation capacity (SFC).

**Table S2.** Lambda values of the Box-Cox transformed  $D_r(\text{in situ})$  and variables measured during anaerobic incubation.

| Data set                 | Lamda values          |                       |        |
|--------------------------|-----------------------|-----------------------|--------|
|                          | $D_r(\text{in situ})$ | $D_{\text{cum}}(365)$ | SRC    |
| Whole data set           | 0.216                 | 0.303                 | -0.024 |
| FFA                      | 0.214                 | 0.369                 | -0.185 |
| GKA                      | 0.257                 | 0.236                 | 0.039  |
| non-sulphidic zone       | 0.041                 | 0.122                 | 1.493  |
| Sulphidic zone           | 0.190                 | 0.260                 | 0.229  |
| transition zone          | -0.150                | -0.029                | -0.159 |
| $\text{NO}_3^-$ -bearing | 0.099                 | 0.337                 | 0.797  |
| $\text{NO}_3^-$ -free    | 0.319                 | 0.670                 | 0.492  |

**Table S3.** Simple regressions between  $D_r(\text{in situ})$  and individual sediment parameters from aquifer parallels.  $f^{B-C}(X) = A + B \times f^{B-C}(D_r(\text{in situ}))$ . For each sub data set the two sediment parameters with the best correlation coefficient with  $D_r(\text{in situ})$  are listed.

230

| Data set                 | $X^a$              | $N^b$ | A     | B      | $R^c$ | $R^2$ |
|--------------------------|--------------------|-------|-------|--------|-------|-------|
| Whole data set           | $\text{SO}_4^{2-}$ | 29    | 3.697 | -0.564 | 0.58  | 0.33  |
| Whole data set           | $C_{\text{org}}$   | 34    | 5.516 | 0.134  | 0.40  | 0.16  |
| FFA                      | $C_{\text{hws}}$   | 14    | 19.74 | 1.754  | 0.75  | 0.56  |
| FFA                      | $\text{SO}_4^{2-}$ | 11    | 3.263 | -0.472 | 0.72  | 0.52  |
| GKA                      | total-S            | 18    | 92.88 | 17.51  | 0.75  | 0.56  |
| GKA                      | $C_{\text{org}}$   | 18    | 5.612 | 0.324  | 0.69  | 0.48  |
| non-sulphidic            | total-S            | 11    | 5.128 | 0.150  | 0.62  | 0.38  |
| non-sulphidic            | $C_{\text{org}}$   | 11    | 680.1 | 51.58  | 0.42  | 0.18  |
| sulphidic                | total-S            | 23    | 543.2 | -109.7 | 0.69  | 0.48  |
| sulphidic                | $\text{SO}_4^{2-}$ | 18    | 3.540 | -0.614 | 0.49  | 0.24  |
| transition zone          | total-S            | 8     | 0.608 | -0.001 | 0.60  | 0.36  |
| transition zone          | $C_{\text{org}}$   | 8     | 5.341 | -0.601 | 0.73  | 0.53  |
| $\text{NO}_3^-$ -bearing | $C_{\text{org}}$   | 17    | 151.0 | 12.75  | 0.55  | 0.30  |
| $\text{NO}_3^-$ -bearing | $\text{SO}_4^{2-}$ | 14    | 5.612 | -0.501 | 0.53  | 0.28  |
| $\text{NO}_3^-$ -free    | $\text{SO}_4^{2-}$ | 15    | 3.085 | -0.844 | 0.51  | 0.26  |
| $\text{NO}_3^-$ -free    | $C_1$              | 14    | 34.51 | 5.418  | 0.29  | 0.08  |

<sup>a</sup> Independent sediment parameter; <sup>b</sup> Sample number; <sup>c</sup> Correlation coefficient;  $\text{SO}_4^{2-}$  extractable sulphate-S;  $C_{\text{hws}}$  hot-water soluble organic carbon;  $C_1$   $\text{KMnO}_4$  labile organic carbon;  $C_{\text{org}}$  total organic carbon; total-S total sulphur.

235



**Table S4.** Lambda values of the Box-Cox transformed sediment parameters.

| Data set          | Lamda values |                |                       |           |         |                    |              |           |        |
|-------------------|--------------|----------------|-----------------------|-----------|---------|--------------------|--------------|-----------|--------|
|                   | $D_r(7)$     | $D_{cum}(365)$ | $D_r(\text{in situ})$ | $C_{org}$ | total-S | $SO_4^{2-}_{extr}$ | $DOC_{extr}$ | $C_{hws}$ | $C_l$  |
| Whole data set    | 0.487        | 0.303          | 0.216                 | -0.050    | 0.132   | 0.457              | 0.946        | 0.825     | 0.199  |
| FFA               | 0.583        | 0.369          | 0.214                 | -0.191    | -0.292  | 0.254              | -            | 0.915     | 0.513  |
| GKA               | 0.445        | 0.236          | 0.257                 | -0.052    | 0.685   | 0.628              | -1.307       | -0.203    | 0.291  |
| non-sulphidic     | -0.168       | 0.122          | 0.041                 | 1.060     | 0.062   | 1.161              | -            | 1.434     | 0.183  |
| sulphidic         | 0.375        | 0.260          | 0.190                 | 0.162     | 0.965   | 0.368              | -1.931       | 1.314     | -0.081 |
| transition zone   | 0.397        | -0.029         | -0.150                | -0.158    | -1.649  | 0.642              | -0.012       | 0.783     | -0.834 |
| $NO_3^-$ -bearing | 0.121        | 0.337          | 0.099                 | 0.752     | -0.228  | 0.679              | -            | 2.949     | 0.492  |
| $NO_3^-$ -free    | 0.364        | 0.670          | 0.319                 | 0.378     | 1.998   | 0.297              | -3.158       | 0.970     | 0.452  |

240

**Table S5.** Lambda values of the Box-Cox transformed variables.

| Data set          | Lamda values |         |         |            |        |
|-------------------|--------------|---------|---------|------------|--------|
|                   | SRC          | $SRC_C$ | $SRC_S$ | $aF_{SRC}$ | SFC    |
| Whole data set    | -0.024       | -0.050  | 0.132   | 0.155      | 0.176  |
| FFA               | -0.185       | -0.191  | -0.291  | 0.326      | 0.187  |
| GKA               | 0.039        | -0.052  | 0.685   | -0.139     | 0.193  |
| non-sulphidic     | 1.493        | 1.043   | -0.054  | 0.095      | -0.014 |
| sulphidic         | 0.229        | 0.159   | 0.941   | -0.313     | 0.117  |
| transition zone   | -0.159       | -0.158  | -1.650  | -0.089     | -0.152 |
| $NO_3^-$ -bearing | 0.797        | 0.745   | -0.307  | 0.069      | 0.120  |
| $NO_3^-$ -free    | 0.492        | 0.375   | 1.914   | -0.266     | 0.344  |

245

250

## References:

255

Addy, K., Kellogg, D. Q., Gold, A. J., Groffman, P. M., Ferendo, G., and Sawyer, C.: In situ push-pull method to determine ground water denitrification in riparian zones, *J. Environ. Qual.*, 31, 1017-1024, 2002.

260

Altman, D. G. and Bland, J. M.: Measurement in Medicine - The analysis of method comparison studies, *Statistician*, 32, 307-317, 1983.

Bland, J. M. and Altman, D. G.: Applying the right statistics: Analyses of measurement studies, *Ultrasound in Obstetrics & Gynecology*, 22, 85-93, 2003.

Bland, J. M. and Altman, D. G.: Comparing methods of measurement - Why plotting difference against standard method is misleading, *Lancet*, 346, 1085-1087, 1995.

265

Bland, J. M. and Altman, D. G.: Statistical methods for assessing agreement between two methods of clinical measurement, *Lancet*, 1, 307-310, 1986.

Eschenbach, W. and Well, R.: Online measurement of denitrification rates in aquifer samples by an approach coupling an automated sampling and calibration unit to a membrane inlet mass spectrometry system, *Rapid Commun. Mass Spectrom.*, 25, 1993-2006, 2011.

270

Kana, T. M., Darkangelo, C., Hunt, M. D., Oldham, J. B., Bennett, G. E., and Cornwell, J. C.: Membrane inlet mass-spectrometer for rapid high-precision determination of N<sub>2</sub>, O<sub>2</sub>, and Ar in environmental water samples, *Anal. Chem.*, 66, 4166-4170, 1994.
